# Supplementary material
Source: publisher site journal article supplement (http://www.kjim.org/upload/media/kjim-2022-183-Supplementary-Table-1.pdf)
Supplement: Supplementary file 1 [file kjim-2022-183-Supplementary-Table-1.pdf]

**Supplementary Table 1. Subsequent treatments after daratumumab therapy**

| Subsequent treatments    | Overall (n = 50) | ALC <sup>D56</sup> > 700/ $\mu$ L (n = 39) | ALC <sup>D56</sup> $\leq$ 700/ $\mu$ L (n = 11) |
|--------------------------|------------------|--------------------------------------------|-------------------------------------------------|
| IMiDs <sup>a</sup>       | 7 (14.0)         | 6 (15.4)                                   | 1 (9.1)                                         |
| PIs <sup>a</sup>         | 7 (14.0)         | 7 (17.9)                                   | 0                                               |
| Cytotoxic chemotherapy   | 7 (14.0)         | 5 (12.8)                                   | 2 (18.2)                                        |
| No treatment             | 2 (4.0)          | 2 (5.1)                                    | 0 (0.0)                                         |
| Death                    | 10 (20.0)        | 4 (10.3)                                   | 6 (54.5)                                        |
| Others                   | 1 (2.0)          | 1 <sup>b</sup> (2.6)                       | 0                                               |
| Daratumumab <sup>c</sup> | 16 (32.0)        | 14 (35.9)                                  | 2 (18.2)                                        |

Values are presented as number (%).

ALC<sup>D56</sup>, absolute lymphocyte counts at the day prior to the third cycle of daratumumab; IMiD, immunomodulatory drug; PI, proteasome inhibitor.

<sup>a</sup>No patient was treated with combination therapy with IMiDs and PIs.

<sup>b</sup>One patient was diagnosed with myelodysplastic syndrome during daratumumab therapy.

<sup>c</sup>Patients who responded to daratumumab continued the therapy.
